# Supplementary material for: NMR Precision Metabolomics: Dynamic Peak Sum Thresholding and Navigators for Highly Standardized and Reproducible Metabolite Profiling of Clinical Urine Samples
Source: MDPI journal article supplement (doi:10.3390/metabo14050275), 2024-05-10
Supplement: s1 [file s1]

A

| Year            | 2017  | 2018  | 2019  | 2020   | 2021   | 2022   |
|-----------------|-------|-------|-------|--------|--------|--------|
| metabolomics    | 5479  | 6401  | 7872  | 9512   | 11439  | 12790  |
| proteomics      | 11663 | 12091 | 13000 | 14535  | 16221  | 15442  |
| transcriptomics | 19554 | 20927 | 24343 | 27407  | 30977  | 28979  |
| genomics        | 85799 | 87876 | 94105 | 101790 | 110568 | 103556 |
| epigenomics     | 2029  | 2262  | 2520  | 2904   | 3254   | 3017   |

B

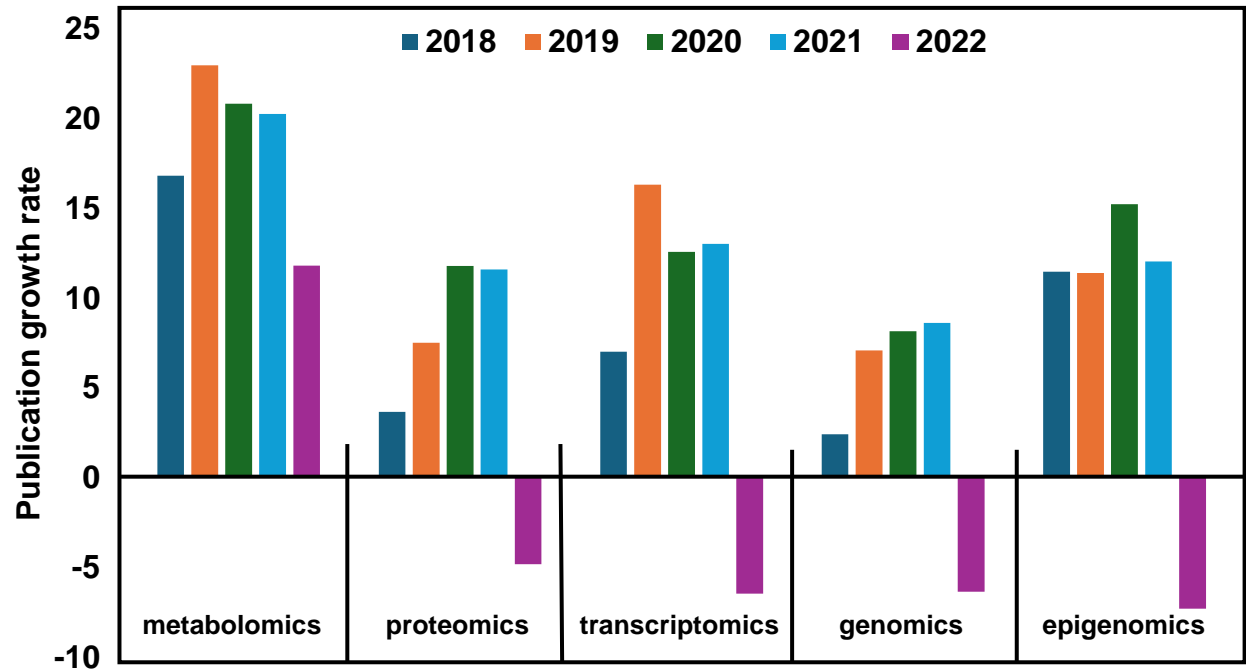

**Figure S1. Five-year publication growth rate for top areas of omics research. (A)** A PubMed search of number of articles published from 2017 to 2022 in metabolomics, proteomics, transcriptomics, genomics and epigenomics was tabulated. **(B)** The growth rate was calculated by determining the difference between two adjacent years, divided by the first year. For each year, the growth rate of metabolomics is greater than all other omic technologies during the last 5 years.

**Table S1. Pearson correlation coefficient of variables to manual cut off.**

| <b>Variables</b>         | <b>Description</b>                                              | <b>Correlation</b> |
|--------------------------|-----------------------------------------------------------------|--------------------|
| manual_cutoff            | Best intensity cutoff manually set by metabolite scientist      | 1.000              |
| sum_gt30xnoise           | Sum of intensity from peaks greater than 30 times the noise     | 0.994              |
| sum_gt60xnoise           | Sum of intensity from peaks greater than 60 times the noise     | 0.994              |
| sum_pos                  | Sum of intensity from all positive peaks                        | 0.994              |
| sum_gt10xnoise           | Sum of intensity from peaks greater than 10 times the noise     | 0.994              |
| cutoff_top250            | The cutoff which keeps the 250 peaks with highest intensity     | 0.993              |
| creatinine_3.04x33.06    | The intensity of creatinine peak at 3.04x33.06                  | 0.993              |
| alanine_1.49x19.00       | The intensity of alanine peak at 1.49x19.00                     | 0.990              |
| creatinine_DSS_ratio     | The intensity ratio of creatinine to DSS                        | 0.984              |
| peak_num_gt30xnoise      | Number of peaks greater than 30 times the noise                 | 0.984              |
| peak_num_gt60xnoise      | Number of peaks greater than 60 times the noise                 | 0.982              |
| glucose_5.26x94.86       | The intensity of glucose peak at 5.26x94.86                     | 0.976              |
| sum_pos_dss_ratio        | The ratio of sum of all positive peaks to DSS                   | 0.973              |
| peak_num_gt10xnoise      | Number of peaks greater than 10 times the noise                 | 0.973              |
| peak_num_pos             | Number of all positive peaks                                    | 0.973              |
| mean_gt10xnoise          | Average of intensity from peaks greater than 10 times the noise | 0.958              |
| mean_pos                 | Average of intensity from all positive peaks                    | 0.958              |
| alanine_1.42x19.32       | The intensity of alanine peak at 1.42x19.32                     | 0.954              |
| median_pos               | Median of intensity from all positive peaks                     | 0.948              |
| median_gt10xnoise        | Median of intensity from peaks greater than 10 times the noise  | 0.948              |
| mean_gt60xnoise          | Average of intensity from peaks greater than 60 times the noise | 0.948              |
| mean_gt30xnoise          | Average of intensity from peaks greater than 30 times the noise | 0.939              |
| Noise                    | Spectra noise from parameters.txt                               | 0.927              |
| peak_num_total           | Number of all positive peaks                                    | 0.922              |
| median_gt30xnoise        | Median of intensity from peaks greater than 30 times the noise  | 0.860              |
| median_gt60xnoise        | Median of intensity from peaks greater than 60 times the noise  | 0.831              |
| formate_8.47x14.00       | The intensity of formate peak at 8.47x14.00                     | 0.723              |
| sum_pos_creatinine_ratio | The ratio of sum of all positive peaks to creatinine            | -0.517             |
| dss_intensity            | Intensity of DSS                                                | -0.680             |

**Table S2. SG clean-up eliminates false positives**

| Analysis                                                | N. of features | Passing by chance | KW  | KW+FC | FDR | FDR + FC |
|---------------------------------------------------------|----------------|-------------------|-----|-------|-----|----------|
| SG = 1.0363 vs SG = 1.0093 (Concentrated and rediluted) | 205            | 10.25             | 105 | 20    | 81  | 18       |
| SG = 1.0363 vs SG = 1.0092                              | 204            | 10.2              | 112 | 18    | 93  | 17       |
| SG = 1.0093 (Concentrated and rediluted) vs SG = 1.0092 | 200            | 10                | 36  | 1     | 0   | 0        |

Listed are the number of features that pass a KW test of significance (KW), the KW and FC cut-off of >1.5, (KW+FC), FDR-adjusted p-value significance (FDR) and FDR and FC cut-off (FDR+FC) for each analysis.

**A**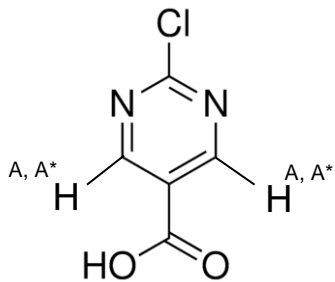**B**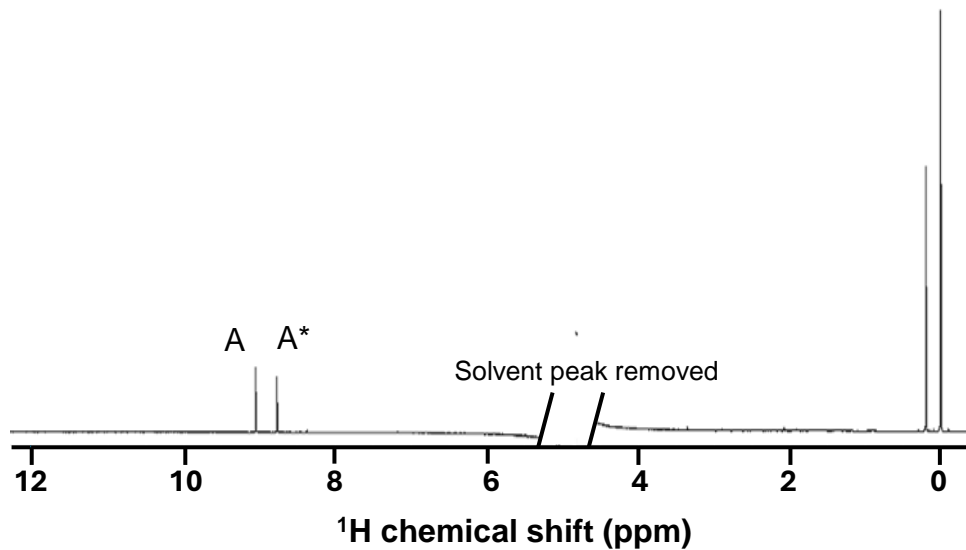**C**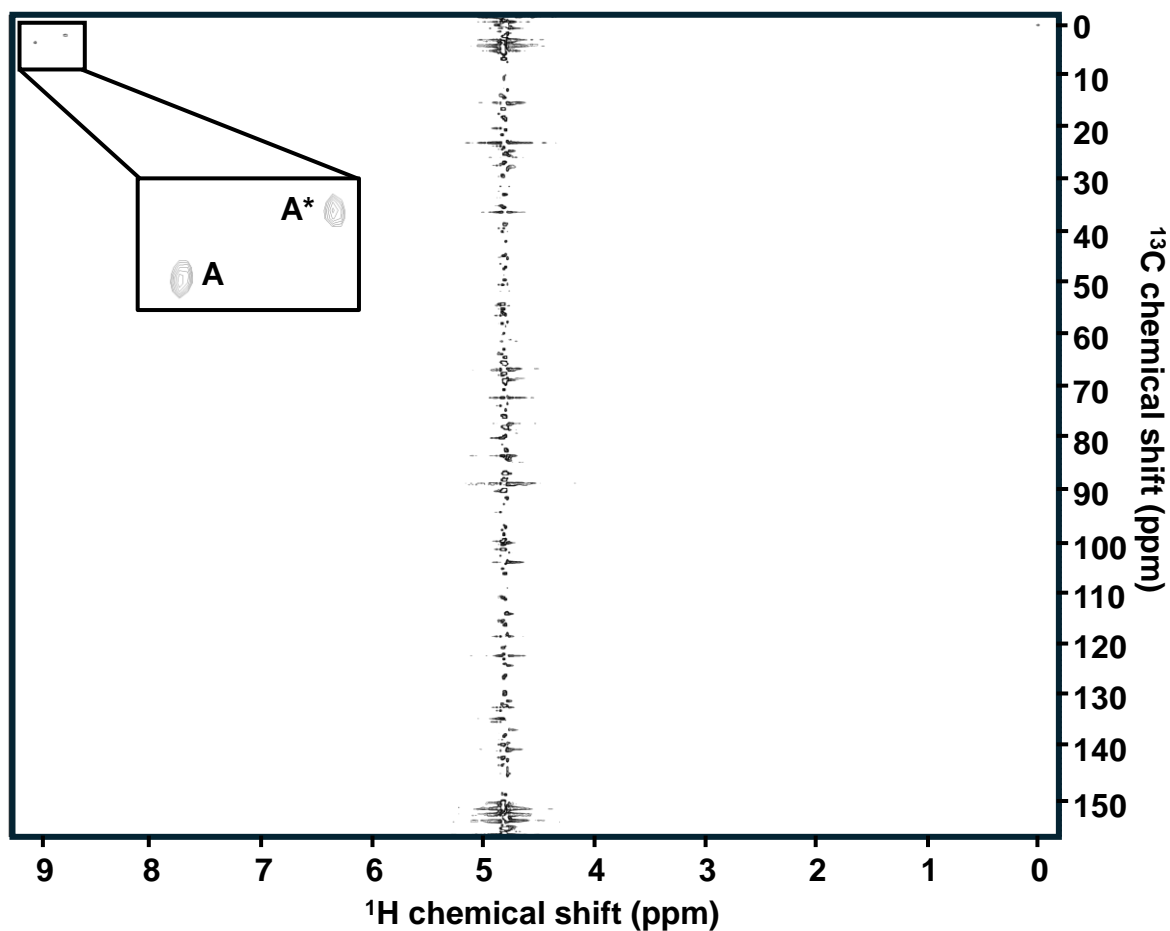

**Figure S2. Reference spectra of Nav1 (2-chloropyrimidine-5-carboxylic acid).** (A) Structure of 2-chloropyrimidine-5-carboxylic acid (CPC5A), used as Navigator 1 (Nav1). (B)  $^1\text{H}$  and (C)  $^1\text{H}$ - $^{13}\text{C}$  HSQC reference spectra for Nav1. Signals A and A\* are generated by the marked protons. Residual solvent signal is shown in the streak at 4.8 ppm.

Table S3. Impact of sample preparation conditions on Nav1 and DSS <sup>1</sup>H AUC.

| Condition                       | Avg DSS AUC ±STD  | Avg Nav1 AUC ±STD | Avg Nav1:DSS ±STD | %CV (Nav1 AUC) | %CV (Nav1:DSS) |
|---------------------------------|-------------------|-------------------|-------------------|----------------|----------------|
| <i>Operator1 Day1</i>           | 3.18E+12±4.79E+10 | 3.19E+11±4.16E+10 | 0.1±0.005         | 6.37           | 5.66           |
| <i>Operator2 Day1</i>           | 3.16E+12±2.55E+10 | 3.05E+11±2.40E+10 | 0.096±0.007       | 7.86           | 7.98           |
| <i>Operator1 Day2</i>           | 3.19E+12±4.22E+10 | 3.76E+11±1.22E+10 | 0.118±0.003       | 3.25           | 2.91           |
| <i>Operator2 Day2</i>           | 3.21E+12±5.24E+10 | 3.70E+11±1.85E+10 | 0.115±0.006       | 5.82           | 6.66           |
| <i>Operator1 Day1-Day2</i>      | 3.18E+12±4.19E+10 | 3.51E+11±3.36E+10 | 0.11±0.01         | 9.65           | 9.27           |
| <i>Operator2 Day1-Day2</i>      | 3.18E+12±4.68E+10 | 3.38E+11±3.97E+10 | 0.105±0.011       | 11.77          | 11.31          |
| <i>Operator1+2 Day1-Day2</i>    | 3.10E+12±3.81E+11 | 3.42E+11±3.61E+10 | 0.107±0.01        | 10.55          | 10.16          |
| <i>Skipping CHCl3</i>           | 3.15E+12±4.76E+10 | 3.07E+11±8.76E+09 | 0.097±0.002       | NA             | NA             |
| <i>Skipping water</i>           | 3.21E+12±6.88E+10 | 2.43E+11±3.87E+10 | 0.075±0.012       | NA             | NA             |
| <i>Losing 1/3 Aqueous phase</i> | 3.24E+12±4.56E+10 | 2.20E+11±1.07E+10 | 0.067±0.003       | NA             | NA             |
| <i>Losing 1/2 Aqueous phase</i> | 3.01E+12±5.52E+11 | 1.69E+11±3.02E+10 | 0.056±0.004       | NA             | NA             |

Listed are the average (avg) AUC and standard deviation (STD) for DSS, Nav1 and Nav1:DSS AUC ratio in <sup>1</sup>H spectra. The coefficient of variation (%CV) for Nav1 and Nav1:DSS ratio is provided for each condition where applicable.

A

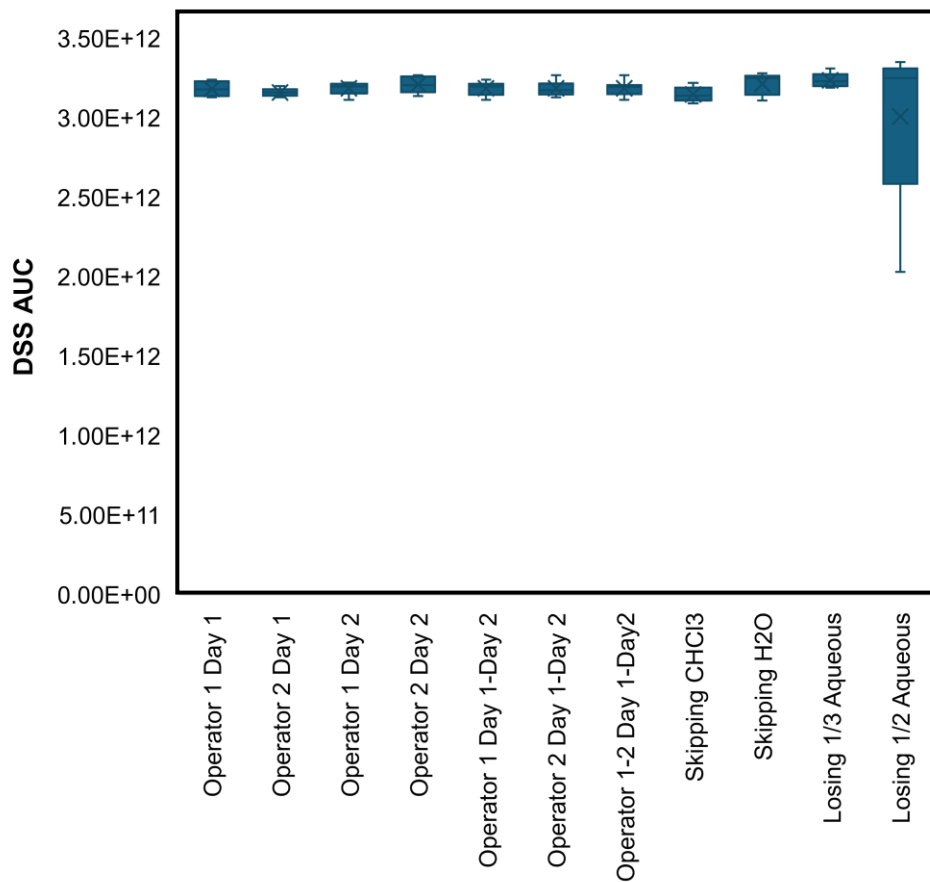

B

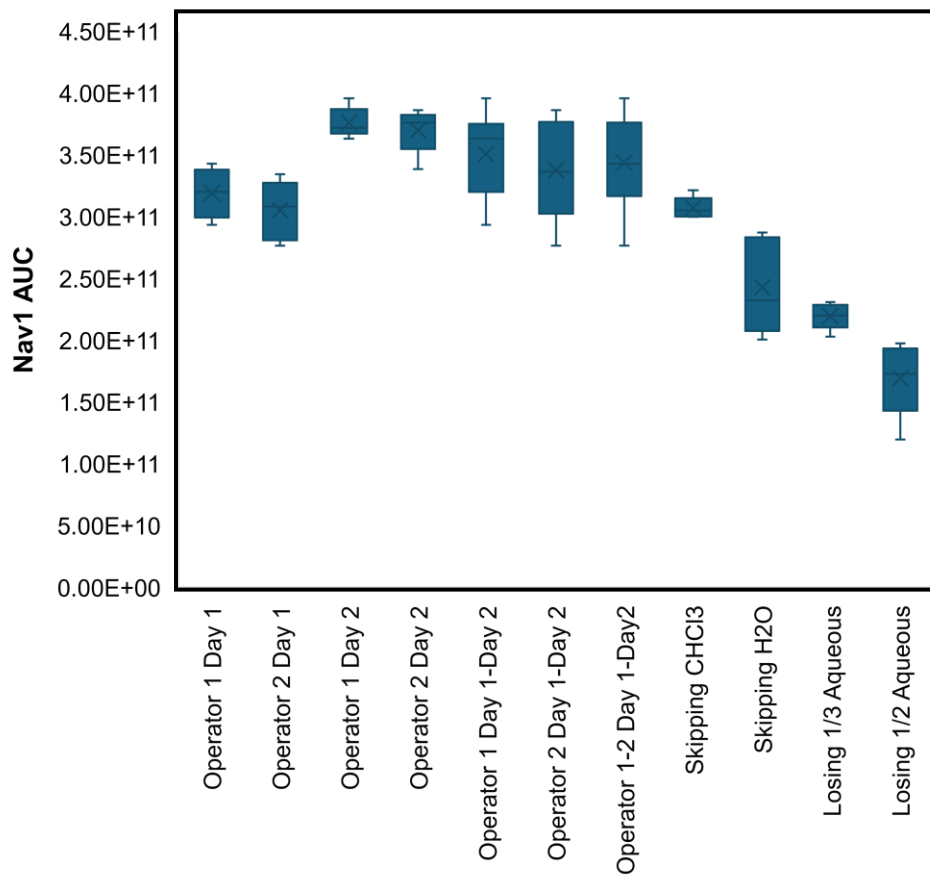

**Figure S3. Nav1, but not DSS, is impacted by sample processing errors.** (A) The 1H AUC of DSS is consistent for nearly all conditions while, the 1H AUC of Nav1 (B) significantly varies based on variations in sample processing.

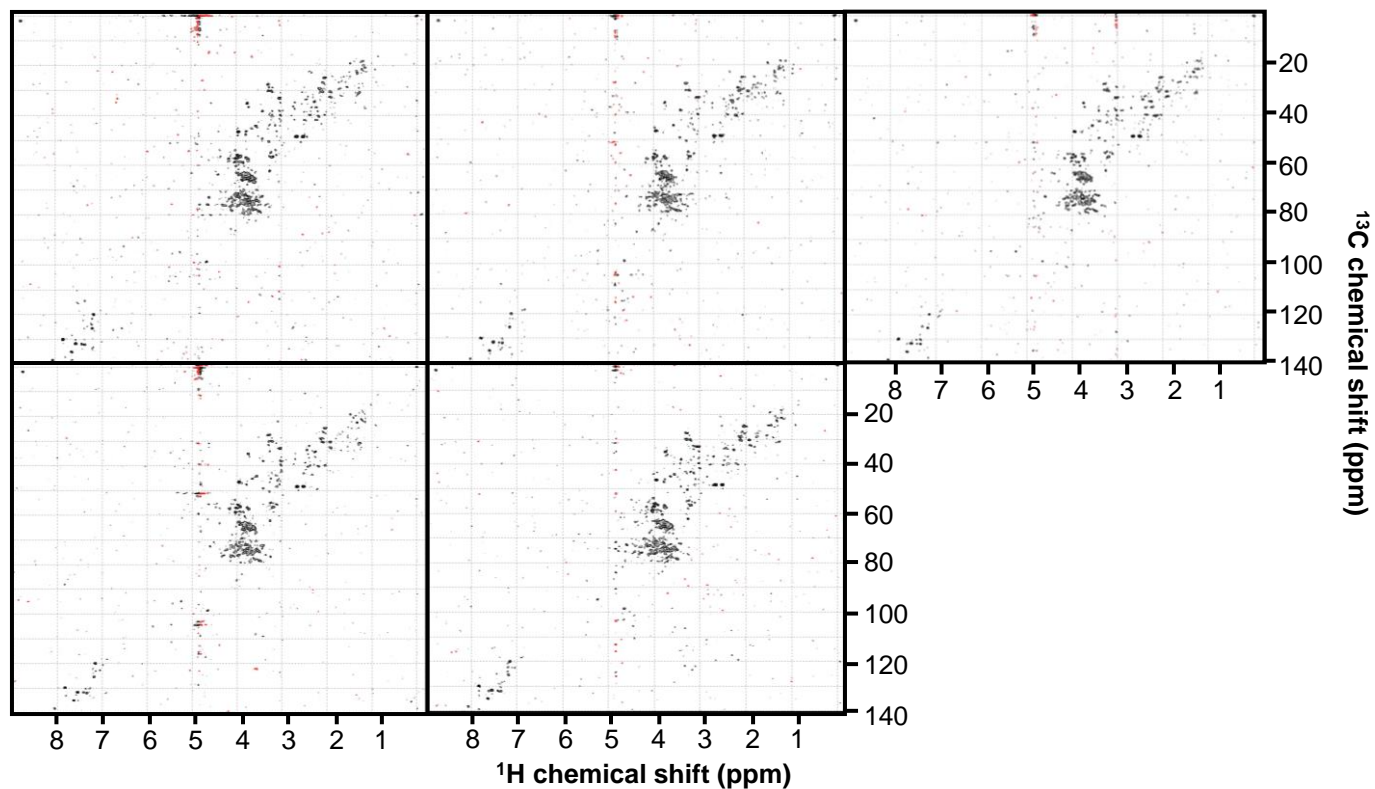

**Figure S4.  $^1\text{H}$ - $^{13}\text{C}$  HSQC spectra of highly dilute urine samples at sum-based cutoff.** Five replicates of urine at a dilute SG of 1.0012 show high levels of noise that will add unwanted intensity signals and thus should not be used for analysis.

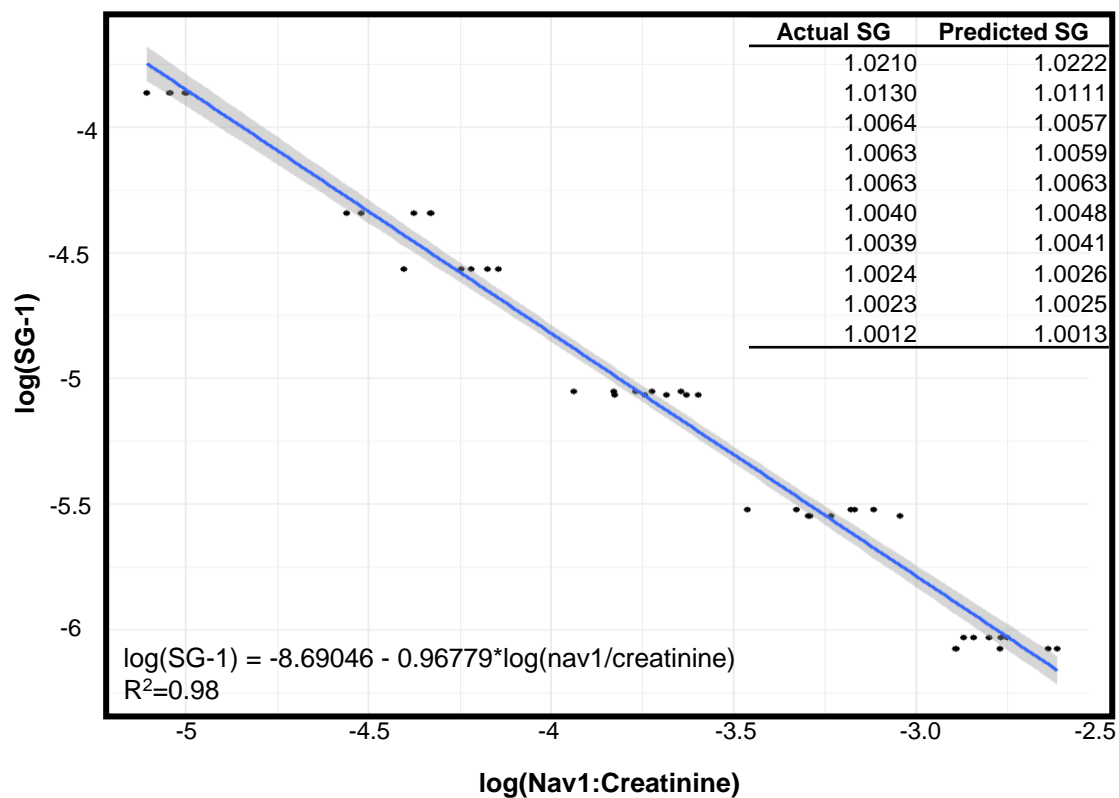

**Figure S5. Nav1:Creatinine can predict original sample SG.** A model was built using the equation reported in the figure to calculate original sample SG from Nav1:Creatinine. A strong correlation between these two variables is demonstrated (R<sup>2</sup>=0.98). The 95% CI range is shown in light blue.



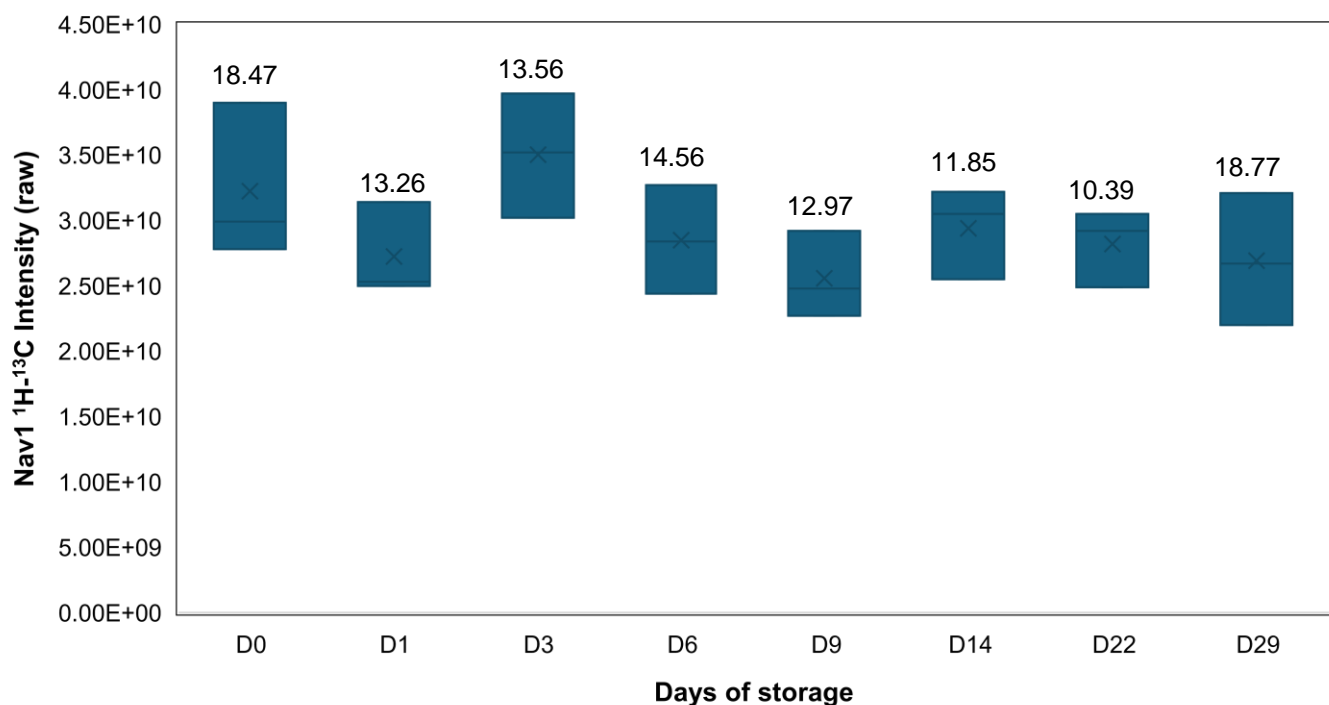

**Figure S6. Nav1 is stable in a solution stored at 4 °C ~30 days.** Nav1  $^1\text{H}$ - $^{13}\text{C}$  intensity shows minimal variation at 4 °C up to 29 days. %CV for each day is reported on top of the box plots and the total percent CV is 16% across 29 days.

**A**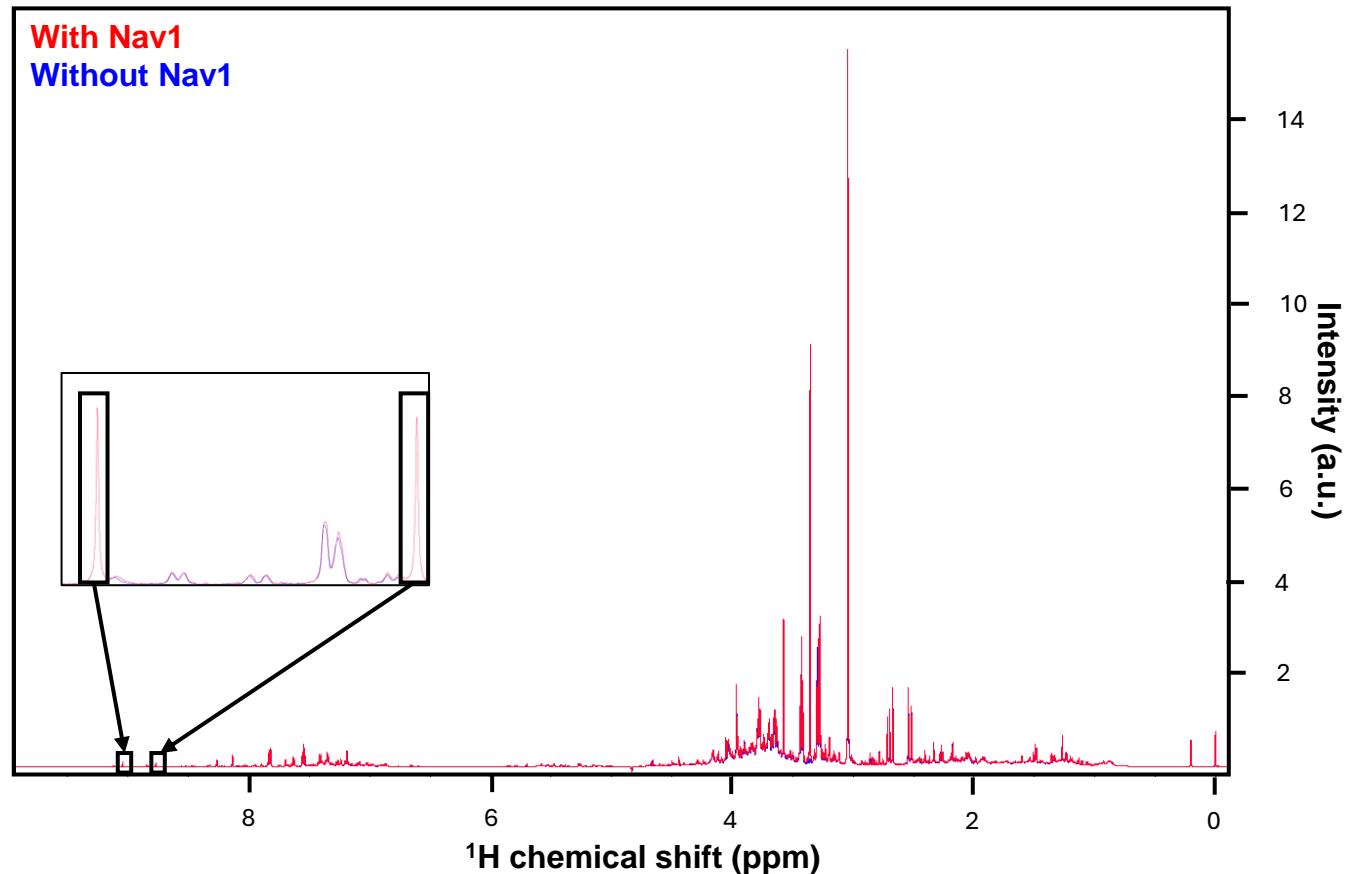**B**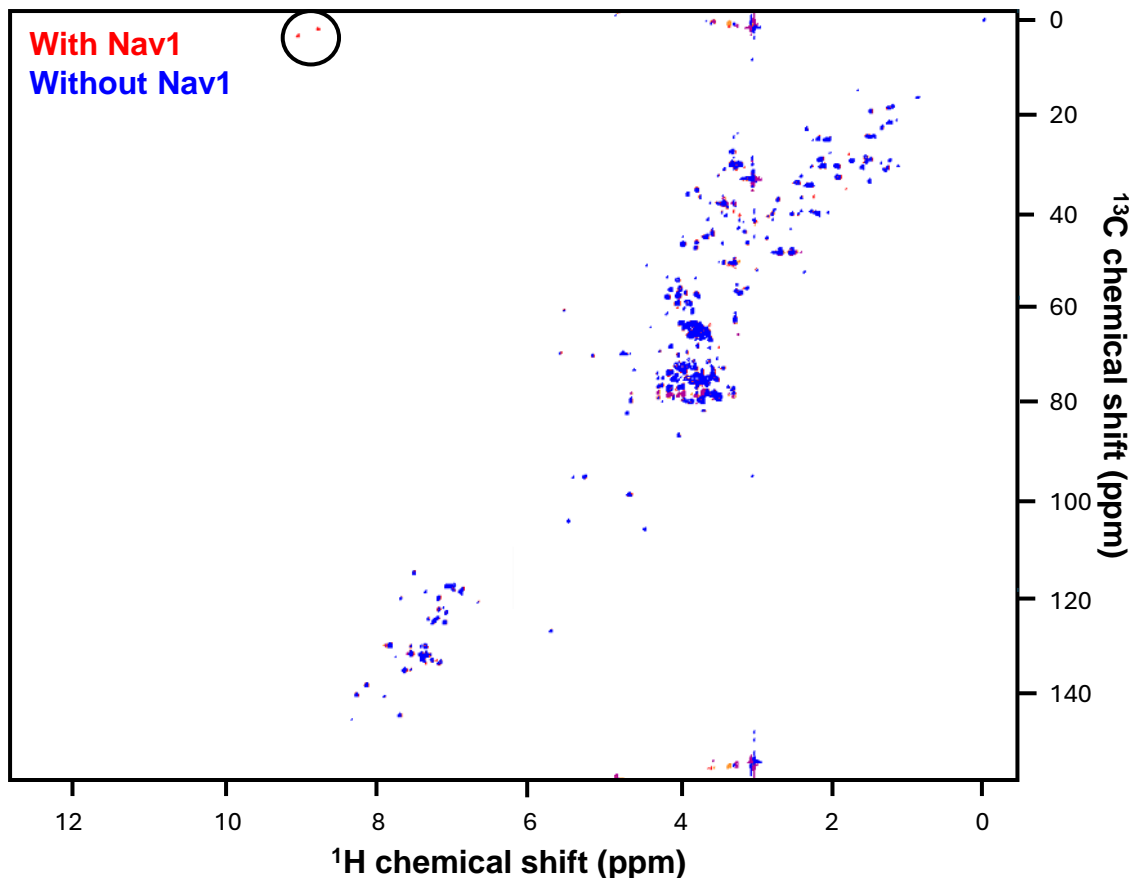

**Figure S7. Nav1 addition does not alter sample resonances.** The addition of Nav1 does not alter metabolite resonances with little to no spectra differences observed in (A) the 1D and (B) the 2D with (red) and without (blue) the addition of Nav1 at the beginning of sample processing. A zoom-in of the region containing Nav1 peaks is shown in A.

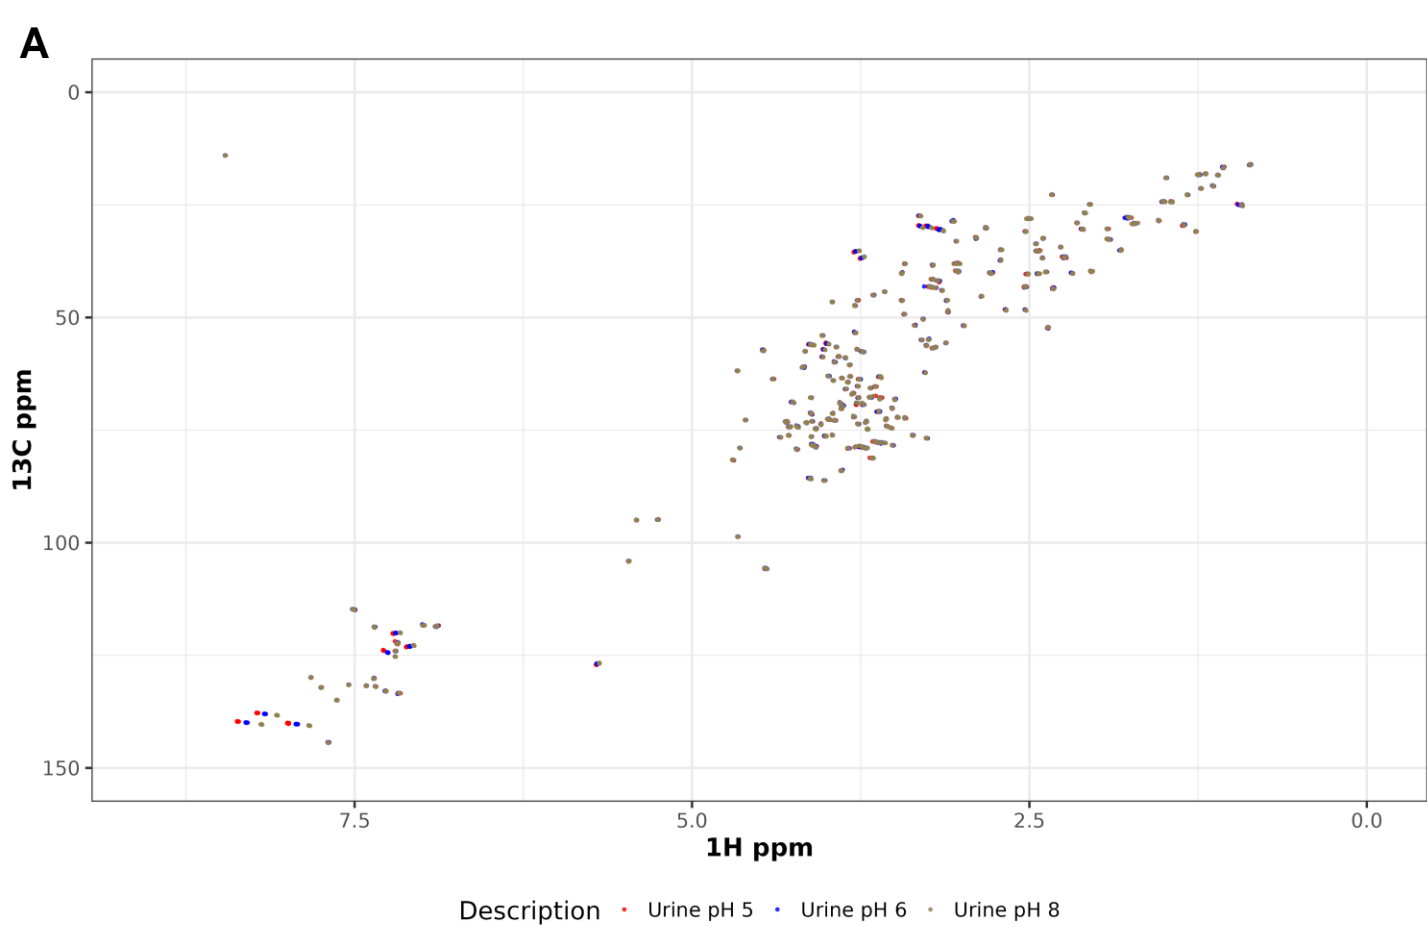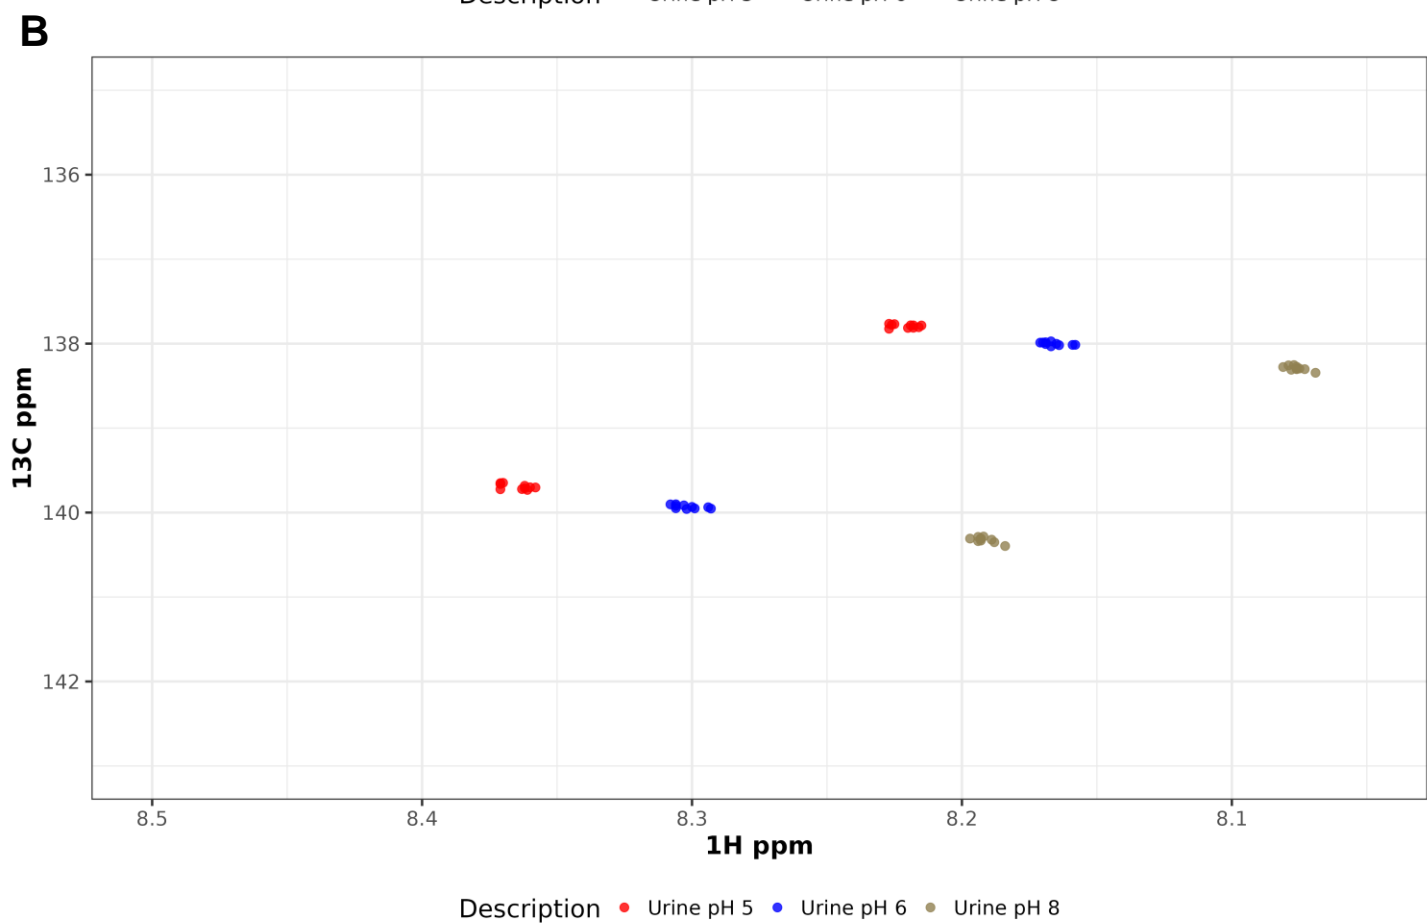

**Figure S8. Chemical shift perturbation due to pH variation. (A)** Overlay of resonances from 30 urine spectra samples with initial pH of 5 (red), 6 (blue), and 8 (brown), displaying pH-dependent chemical shift perturbations. **(B)** Zoomed in the region of 8-8.5x135-143 in <sup>1</sup>Hx<sup>13</sup>C ppm highlight significant chemical perturbations across samples.

A

| Sample | DFTMP<br>hppm | Initial<br>pH | Final<br>pH |
|--------|---------------|---------------|-------------|
| 1      | 0.20392       | 4.99          | 6.8         |
| 2      | 0.20338       | 4.99          | 6.82        |
| 3      | 0.20374       | 4.99          | 6.8         |
| 4      | 0.2036        | 4.99          | 6.82        |
| 5      | 0.20338       | 4.99          | 6.81        |
| 6      | 0.20227       | 6.08          | 6.94        |
| 7      | 0.20245       | 6.08          | 6.94        |
| 8      | 0.20254       | 6.08          | 6.93        |
| 9      | 0.20217       | 6.08          | 6.94        |
| 10     | 0.20248       | 6.08          | 6.94        |
| 11     | 0.20066       | 8.08          | 7.14        |
| 12     | 0.20112       | 8.08          | 7.14        |
| 13     | 0.20063       | 8.08          | 7.14        |
| 14     | 0.20082       | 8.08          | 7.14        |
| 15     | 0.20066       | 8.08          | 7.14        |
| 16     | 0.2039        | 4.99          | 6.79        |
| 17     | 0.20384       | 4.99          | 6.79        |
| 18     | 0.20375       | 4.99          | 6.79        |
| 19     | 0.20344       | 4.99          | 6.81        |
| 20     | 0.20341       | 4.99          | 6.81        |
| 21     | 0.20199       | 6.08          | 6.95        |
| 22     | 0.20245       | 6.08          | 6.93        |
| 23     | 0.20239       | 6.08          | 6.95        |
| 24     | 0.20245       | 6.08          | 6.93        |
| 25     | 0.20217       | 6.08          | 6.94        |
| 26     | 0.20088       | 8.08          | 7.14        |
| 27     | 0.20094       | 8.08          | 7.15        |
| 28     | 0.20109       | 8.08          | 7.14        |
| 29     | 0.20091       | 8.08          | 7.14        |
| 30     | 0.20109       | 8.08          | 7.13        |

B

Final pH = -119.7\*DFTMP + 31.174

Initial pH = -1096.4\*DFTMP + 228.17

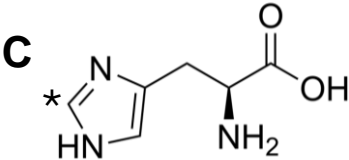

Predicted Initial pH = 4.53  
Predicted Final pH = 6.79

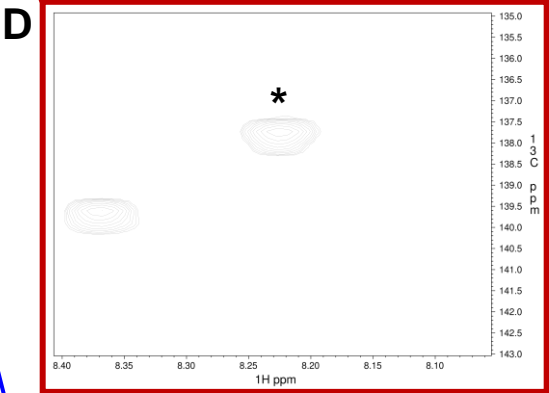

Predicted Initial pH = 6.37  
Predicted Final pH = 6.98

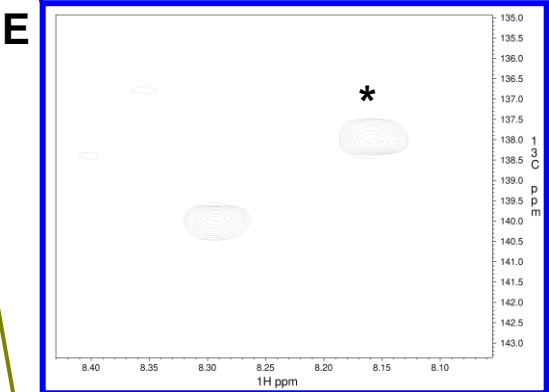

Predicted Initial pH = 8.16  
Predicted Final pH = 7.17

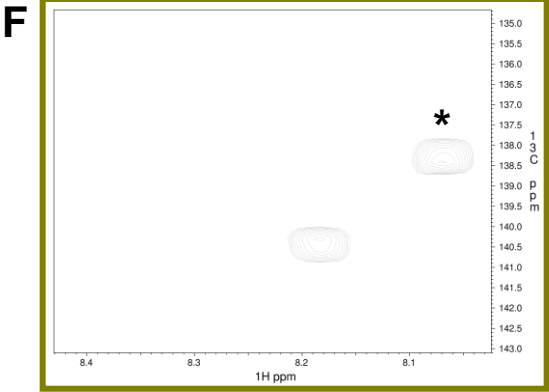

**Figure S9. DFTMP can guide clustering of pH sensitive peaks.** (A) In a cohort of 30 samples with different initial and final pH, the chemical shift for DFTMP in 1D  $^1\text{H}$  NMR spectra was measured. (B) Equations to predict initial and final pH by using DFTMP chemical shift. (C) Structure of histidine highlighting (\*) one of the pH-sensitive protons. (D-F) Examples of the pH-sensitive histidine peak in  $^1\text{H}$ - $^{13}\text{C}$  HSQC urine spectra with different pH. Knowing the pH of each sample empowered all histidine peaks which had a chemical shift variation of 0.17 in both  $^1\text{H}$  and  $^{13}\text{C}$  across the cohort to be clustered as a single feature.

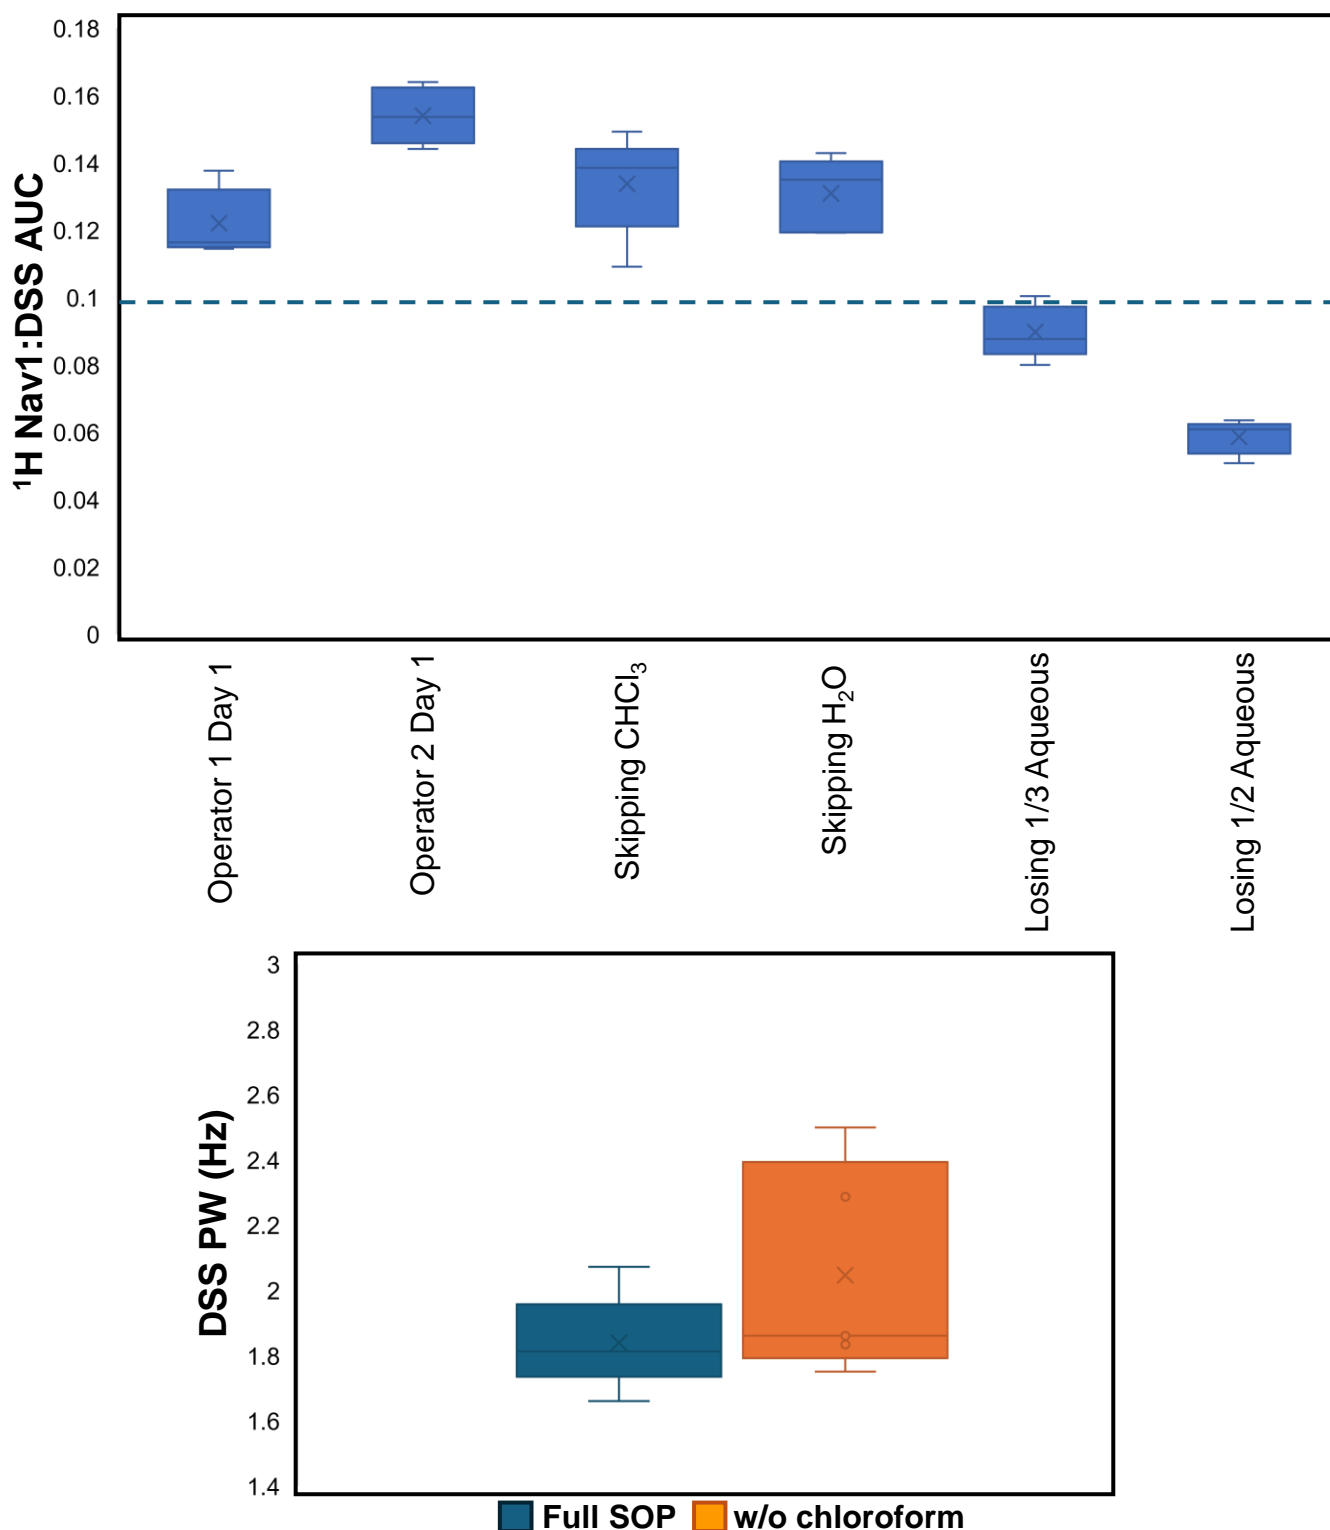

**Figure S10. Nav1 and DSS as Navigators for plasma precision metabolomics. (A)**  $^1\text{H}$  Nav1:DSS AUC ratio is a sensitive indicator for variations in sample processing, wherein a ratio of  $< 0.1$  (dotted line) signals suboptimal metabolite extraction. **(B)** In metabolites extracted from plasma, DSS PW at half-height is  $\leq 2$  Hz following the full SOP. Samples in which protein precipitation steps are skipped (i.e., without the chloroform addition) have a greater range and higher average peak width value. Five replicates for each condition were tested with standard deviation represented by error bars.
